1        **Dicistronic tRNA-mRNA transcripts in grapevine (*Vitis vinifera*) display**  
2        **distinct, regional expression patterns that correlate with tRNA expression.**

3        Pastor Jullian Fabres<sup>1</sup>, Na Sai<sup>1,2</sup>, Stephen Pederson<sup>3</sup>, Fei Zheng<sup>1,2</sup>, James Breen<sup>3</sup>, Matthew  
4        Gilliham<sup>1,2,4</sup>, Penny Tricker<sup>1</sup>, Carlos M. Rodríguez López<sup>a,1,5</sup>, Rakesh David<sup>a,1,2</sup>

5        <sup>1</sup> School of Agriculture, Food and Wine, University of Adelaide, Adelaide, Australia

6        <sup>2</sup> ARC Centre of Excellence in Plant Energy Biology, Waite Research Institute & School of  
7        Agriculture, Food and Wine, University of Adelaide, Adelaide, Australia

8        <sup>3</sup> Bioinformatics Hub, School of Biological Sciences, University of Adelaide, Adelaide, SA,  
9        Australia.

10       <sup>4</sup>ARC Industrial Transformation Training Centre in Innovative Wine Production, Waite Research  
11       Institute & School of Agriculture, Food and Wine, University of Adelaide, Adelaide, Australia

12       <sup>5</sup> Environmental Epigenetics and Genetics Group, Department of Horticulture, College of  
13       Agriculture, Food and Environment, University of Kentucky, Lexington KY, U.S.A

14       <sup>a</sup> Joint senior authorship

15       Corresponding author: Carlos M. Rodríguez López

16       Email: carlos.rodriguezlopez@uky.edu

17       **Running title:** Detection of dicistronic tRNA-mRNAs in *V. vinifera*

18       **Keywords:** tRNA-mRNA dicistronic transcripts, tRNA, grapevine, Mobile RNAs, syntenic  
19       genomic arrangement, *Vitis vinifera* L., RNA-seq, transcriptomics

## 20 **Abstract**

21 Transfer RNAs (tRNA) are crucial adaptor molecules between messenger RNA (mRNA) and  
22 amino acids. Recent evidence in plants suggests that dicistronic tRNA-like structures can also act  
23 as mobile signals for mRNA transcripts to move between distant tissues. Co-transcription is not a  
24 common feature in the plant nuclear genome and, in the few cases where polycistronic  
25 transcripts have been found, they include the expression of non-coding RNA species such as  
26 small nucleolar RNAs and microRNA clusters. It is not known, however, the extent to which  
27 dicistronic transcripts of tRNA and mRNAs are expressed in field-grown plants, or the factors  
28 contributing to their expression. To address these questions, we analysed tRNA-mRNA  
29 dicistronic transcripts in the major horticultural crop grapevine (*Vitis vinifera*) using a novel  
30 pipeline developed to identify dicistronic transcripts from high-throughput RNA sequencing  
31 data. We identified dicistronic tRNA-mRNA in grapevine leaf and berry samples from 22  
32 commercial vineyards covering six sub-regions of the Barossa wine growing region, Australia.  
33 Of the 124 tRNA genes that were expressed in both tissues, 18 tRNA were expressed forming  
34 part of 19 dicistronic tRNA-mRNA molecules. The presence and the abundance of dicistronic  
35 molecules was tissue and geographic sub-region specific. In leaf tissue, the expression patterns  
36 of dicistronic tRNA-mRNAs significantly correlated with tRNA expression, suggesting that  
37 transcriptional regulation of their expression might be linked. We also found evidence of  
38 evolutionary conservation of dicistronic candidates in grapevine, and previously reported  
39 dicistronic transcripts in *Arabidopsis*, indicating a syntenic genomic arrangement of tRNAs and  
40 protein coding genes between species.

41

42



## 44 **Introduction**

45 Polycistronic mRNAs are RNA molecules that contain two or more open reading frames (ORFs).  
46 These are usually found in viruses, bacteria, archaea, protozoans and invertebrates (Karginov et  
47 al. 2017). Polycistronic transcripts are synthesized when multiple genes forming an operon are  
48 coexpressed from a single promoter. These transcripts are then translated into protein from two  
49 or more translation initiation sites. This strategy has been described as an efficient mechanism to  
50 coordinate gene expression (Karginov et al. 2017). Although polycistronic transcripts are less  
51 common in plants, several chloroplast genes are organized in clusters and are co-transcribed in  
52 polycistronic primary transcripts and subsequently processed to form mature RNAs (Sugita and  
53 Sugiura 1996), reflecting their prokaryotic ancestry (Barkan 2011). The majority of nuclear-  
54 encoded genes in plants are monocistronic with a few exceptions, such as certain classes of  
55 polycistronic microRNAs (miRNAs) (Merchan et al. 2009) and small nucleolar RNAs  
56 (snoRNAs), which are organized in genomic clusters and are transcribed from a common  
57 promoter (Kruszka et al. 2003; Leader et al. 1997). These precursor transcripts are processed to  
58 mature snoRNA and miRNA molecules. There are also a few reports of dicistronic transcripts  
59 encoding genes that are not functionally related to each other such as tRNAs-snoRNA, snoRNA-  
60 miRNAs and tRNA-mRNA in some plant species (Kruszka et al. 2003; Michaud et al. 2011; Qu  
61 et al. 2015; Zhang et al. 2016); however, the molecular and physiological significance of co-  
62 transcription for many of these transcripts is still poorly understood.

63 Recent work in model plants, *Arabidopsis thaliana* and tobacco, has shed light on the function of  
64 dicistronic tRNAs-mRNAs (Zhang et al. 2016). Using transgenic lines, Zhang et al. (2016)  
65 demonstrated that tRNA-like structures (TLSs), when co-transcribed with mRNA transcripts,  
66 could act as mobility signals, triggering the systemic movement of the mRNA between roots and

67 shoots. Notably, the mRNA components of the dicistronic transcripts were also shown to be  
68 translated into functional proteins. Endogenously produced tRNA-mRNA dicistronic transcripts  
69 have also been detected in *A. thaliana* suggesting that functional tRNA and tRNA-like structures  
70 could act as non-autonomous signals in plants able to deliver functional mRNAs to distantly  
71 located tissues. Beyond their canonical role in protein translation, tRNAs have been also  
72 demonstrated to function in other chemical transformations, for example, delivering amino acids  
73 during lipid modification and antibiotic biosynthesis (Banerjee et al. 2010; Francklyn and  
74 Minajigi 2010).

75 In grapevine (*Vitis vinifera*), the effect of growth environment on gene expression has been  
76 extensively studied (Dal Santo et al. 2013; Liu et al. 2012; Pontin et al. 2010; Sun et al. 2015a).  
77 Several studies have identified small non-coding RNAs (sRNAs) in grapevine that can influence  
78 development in response to environmental stimuli. Among these sRNAs, miRNAs respond to  
79 low temperature treatment (Sun et al. 2015b), application of exogenous gibberellin (Han et al.  
80 2014) and viral infection (Alabi et al. 2012). In addition, studies have shown that miRNAs  
81 present tissue specificity in grapevine (Pantaleo et al. 2010; Wang et al. 2011). Bester et al.  
82 (2017) identified sRNA species in grapevine phloem. Notably, this study also showed the non-  
83 random manner in which tRNA-derived sRNAs originated (Bester et al. 2017). A study looking  
84 at the effect of grafting in grapevine identified more than 3000 genes transporting mRNA across  
85 graph junctions including genes for response to abiotic stress and signal transduction (Yang et al.  
86 2015). Moreover, there is evidence of both passive and selective mechanisms of mRNA  
87 trafficking in grapevine (Yang et al. 2015) and Zhang et al. (2016) confirmed that 11% of the  
88 mobile mRNA also had TLS motifs in their coding sequence or 3' UTR.

89 We hypothesized that dicistronic tRNA-mRNA transcripts would be transcribed differentially  
90 between different grapevine tissues and in growing regions with different environments. As a  
91 first step towards identifying such transcripts, we present DiRT (**D**icistronic **R**NA **T**ranscripts), a  
92 computational pipeline to detect dicistronic transcripts from short-read RNA-seq data that can be  
93 adapted for use in any organism. Using this pipeline, we analysed dicistronic tRNA-mRNA  
94 transcripts in commercial, field-grown grapevine and assessed the effect of regionality on their  
95 expression profile.

## 96 **Results**

### 97 **RNA-sequencing of *Vitis Vinifera* cv. Shiraz**

98 To identify tRNA-mRNA dicistronic transcripts in *Vitis Vinifera* cv. Shiraz, we performed RNA-  
99 seq of libraries from two different tissues, leaf and berry, collected at budburst (E-L 7) and  
100 veraison (E-L 35) (Coombe 1995) respectively, from 22 vineyards from the Barossa wine  
101 growing region, South Australia, Australia (Figure 1). The region divides into six sub-regions,  
102 each with unique combinations of growing environments with factors such as temperature,  
103 rainfall, soil type and elevation contributing to differences in plant growth, berry composition  
104 and wine characteristics (Robinson and Sandercock 2014).

105 Sequencing reads were aligned to the *V. vinifera* reference genome (IGGP\_12X from  
106 EnsemblPlants) with an average mapping percentage of 90% for leaf and 87% for berry samples.  
107 We obtained an average of 23 million and 21 million paired-end (2x75 nucleotide) Illumina  
108 reads for each leaf and berry sample (three plants per sample, three samples per vineyard)  
109 (Supplemental Table S1).

## 110 **Identification of putative dicistronic tRNA-mRNA transcripts**

111 We searched for combinations of tRNA and adjacently located protein coding mRNA genes that  
112 were expressed forming one continuous transcript. With that objective, we developed DiRT, a  
113 bioinformatic pipeline to systematically analyse high-throughput, short read-based RNA-  
114 sequencing data for actively co-transcribed tRNA-mRNA loci (Figure 2). The pipeline takes into  
115 consideration reads mapping in the tRNA, mRNA and the intervening intergenic region to  
116 predict dicistronic tRNA-mRNA candidates. Biological replicates were used to estimate  
117 background noise and improve the accuracy of the predictions.

118 The Genomic tRNA Database predicts 609 tRNA genes in the *V. vinifera* genome based on the  
119 tRNAscan-SE tool (Chan and Lowe 2016). From these, 116 tRNA genes overlapped with protein  
120 coding genes (PCGs) (5' or 3' untranslated regions or introns) and were removed from further  
121 analysis since such reads could not be unambiguously assigned to either the tRNA or the PCG.

122 Using DiRT, we detected 124 and 90 transcribed tRNA genes (read count  $\geq 1$ ) in leaf and berry  
123 tissue samples, respectively, across all sub-regions. Individual tRNA genes displayed a wide-  
124 range of transcript abundances covering the 20 isoacceptor families in both leaves and berries,  
125 showing a distinct tRNA expression profile across the six regions analysed (Supplemental Fig S1  
126 and Supplemental Table S2). We assembled combinations of tRNA-PCGs and identified 81  
127 expressed tRNA-mRNA combinations (Figure 3A) in leaves and 50 in berries. As the intergenic  
128 region between the transcribed tRNA and mRNA for sequence reads would be indicative of co-  
129 transcription, we tested the significance of reads in the intergenic region to eliminate background  
130 noise attributable to DNA contamination or spurious transcription events that would not be  
131 observed in biological replicates. tRNA-mRNA combinations were selected for further analysis  
132 only if the coverage of their intergenic region was significantly higher (t-test, FDR < 0.05) than

133 reads detected in the two closest introns (Figure 3B). Finally, candidates that passed both tests  
134 were tested for continuous read coverage in the intergenic region indicating transcriptional read-  
135 through of the region between the tRNA and the mRNA (Figure 3C). DiRT identified 16  
136 dicistronic tRNA-mRNA transcripts in leaves and nine in berries, of which six were present in  
137 both tissues (Table 1) across 13 of the 19 *V. vinifera* chromosomes. Sequencing coverage was  
138 significantly higher (t-test, FDR < 0.05) in intergenic regions than in the first two introns of  
139 dicistronic tRNA-mRNA pairs. Conversely, no significant difference in coverage was observed  
140 for tRNA-mRNA pairs deemed non-dicistronic (Supplemental Fig S2).

141 In total, 19 individual tRNA genes, representing 13 isoacceptor families were found to be  
142 dicistronic with the neighbouring protein coding genes, among which, glycine tRNA genes were  
143 the most common. We validated, through RT-PCR, two randomly selected tRNA-mRNA  
144 dicistronic candidates (i.e. tRNA<sup>ValCAC</sup>-VIT\_15s0046g02860 and tRNA<sup>ProTGG2.9</sup>-  
145 VIT\_18s0001g09050) identified using DiRT. Primers were design to perform PCR amplification  
146 from the tRNA to the intergenic region from cDNA of leaf samples (Figure 4A). For the two  
147 candidates tested, a single band of the expected product size was obtained (Figure 4B). Sanger  
148 sequencing of the PCR product confirmed the amplification of the intergenic regions (Figure 4C,  
149 Supplemental Table S3).

### 150 **Characteristics of grapevine dicistronic tRNA-mRNA candidates**

151 The genomic distance between expressed tRNA and PCGs that formed dicistronic transcripts  
152 was no longer than 1065 base pairs (bp), with a median intergenic distance of 133 bp (Figure 5).  
153 The observed frequency of mRNAs forming dicistronic transcripts decreased with distance both  
154 upstream and downstream from the tRNA component of the dicistronic pair. We next analysed  
155 the upstream and downstream sequences of the dicistronic tRNA in search of *cis*-acting signals



156 that might explain transcriptional read-through to the adjacent PCG. Sequence analysis of 20 bp  
157 upstream and downstream of the dicistronic tRNA revealed the presence of canonical motifs  
158 associated with tRNA transcription efficiency (Supplemental Fig S3) (Michaud et al. 2011;  
159 Yukawa et al. 2000). This included a high proportion of A nucleotides upstream of the  
160 transcription start site, important for maintaining high tRNA expression, and a short stretch of  
161 downstream T nucleotides for RNA Polymerase III transcription termination. We did not identify  
162 any novel conserved sequence between the dicistronic candidates that could act as a mediating  
163 signal for the co-transcription of the tRNA and PCG.

164 When we compared the expression of both mRNAs and tRNA deemed to be dicistronic in this  
165 study against the background of all expressed genes, we found that dicistronic tRNA-mRNAs'  
166 expression did not correlate with high abundance genes in either leaf or berry tissue  
167 (Supplemental Fig S4). Most values of gene and tRNA expression were between the 25<sup>th</sup> and 75<sup>th</sup>  
168 % of the distribution of the total gene expression.

169 Of the nineteen PCGs that formed dicistronic transcripts, fourteen have annotated functions and  
170 five are described as uncharacterised in the EnsemblPlants release 45 database (Kersey et al.  
171 2018) (Supplemental Table S4). Six of the fourteen characterised genes are associated with  
172 functions relating to nucleic acid binding or processing activity and three are involved in the  
173 flavin biosynthesis pathway. A BLAST search in the *Arabidopsis thaliana* genome revealed 11  
174 of the 19 *Vitis* dicistronic PCGs have a closely related *A. thaliana* ortholog that is either  
175 dicistronic (4/11) (Zhang et al. 2016) or the mRNA has been demonstrated to be mobile (8/11,  
176 PlaMoM database) (Guan et al. 2017) (Supplemental Table S4). Notably, the common *A.*  
177 *thaliana* dicistronic PCGs are also co-transcribed with the same tRNA isodecoder as in  
178 grapevine.

## 179 **Regional patterns of dicistronic expression**

180 We next assessed if the geographical origin of the samples had an effect on the expression of  
181 dicistronic transcripts. We first analysed the expression of all tRNAs expressed in each tissue  
182 and we used hierarchical clustering to group sub-regions according to their tRNA expression  
183 patterns in leaves and berries. Both tissues presented two main clusters containing three sub-  
184 regions each (Figure 6). The tRNA expression in Eastern Edge and Northern Grounds clustered  
185 together in both tissues, while the clustering of the four other subregions were tissue dependent.  
186 We then analysed the expression of the tRNA genes, the intergenic regions and PCGs forming  
187 dicistronic transcripts independently. We used RNA-seq reads mapping specifically to the  
188 intergenic region as a proxy to estimate expression patterns of dicistronic candidates, as reads  
189 mapping to the flanking tRNA and PCG loci could originate from both monocistronic and  
190 dicistronic transcripts (Figure 6). Sub-regional clusters for tRNAs forming part of dicistronic  
191 constructs were similar to those observed for all expressed tRNAs in both tissues (Figure 6). In  
192 leaf, one of the main clusters (SG, EE and NG) was the same for all expressed tRNAs and  
193 tRNAs that were part of dicistronic constructs. While in berry, EE/NG and CG/WR clusters were  
194 the same in all expressed tRNAs and dicistronic tRNAs. EE/NG and CG/WR clustered together  
195 in both tissues, while SG and EV clustering was tissue dependant. When the expression of the  
196 intergenic regions and dicistronic PCGs was used rather than tRNA, sub-regional clustering was  
197 tissue and dicistronic construct component specific (intergenic region or PCG) (Figure 6).

198 Local Fisher Discriminant Analysis (LFDA) on expression patterns of all expressed tRNAs and  
199 the dicistronic construct components (i.e. dicistronic tRNAs, PCG and intergenic regions),  
200 showed that PCGs' expression patterns occupying and a unique eigen space, while dicistronic  
201 tRNAs and and intergenic regions shared the eigen space occupied by all expressed tRNAs

202 (Supplemental Fig S5). Consistent with this observation, correlation analyses of the expression  
203 of the different part of the candidates dicistronic transcripts showed that the absolute values of  
204 Pearson correlation coefficients were generally higher between the expression of dicistronic  
205 tRNAs and the expression of the intergenic region than between the expression of PCGs and the  
206 expression of the intergenic regions on both tissues (Supplemental Table S5). These correlations  
207 were only significant (Pearson correlation, p-value < 0.05) between dicistronic tRNAs and  
208 intergenic regions in leaves (Supplemental Table S5).

## 209 **Discussion**

210 In this study, using an RNA-seq approach, we found that 15.3% (19/124) of all expressed tRNAs  
211 in grapevine leaf and berry samples were putatively expressed in a dicistronic manner, with  
212 neighbouring protein coding genes. We developed DiRT, a customised, computational pipeline  
213 to specifically detect co-transcribed tRNA and mRNA candidates using stringent criteria. Using  
214 DiRT we were able to identify dicistronic transcripts in two different grapevine tissues (i.e. leaf  
215 and berry) sampled from commercial vineyards. Validation of the pipeline to accurately predict  
216 dicistronic candidates was confirmed through RT-PCR detection and Sanger sequencing of  
217 dicistronic candidates in leaf samples.

218 Interestingly, of the 12 tRNA isoacceptor families (representing 15 distinct anticodons) found to  
219 be dicistronic in *Vitis vinifera*, 11 tRNA families have also found to be dicistronic in *A. thaliana*,  
220 suggesting conservation amongst plant tRNAs that form dicistronic transcripts. Furthermore, the  
221 11 tRNA families in *A. thaliana* were dicistronically associated with transcripts that were  
222 demonstrated to be mobile between roots and shoots (Thieme et al. 2015; Zhang et al. 2016).  
223 Among these tRNA coding for Gly<sup>GCC</sup> and Met<sup>CAT</sup> were able to mobilise mRNA transcripts to  
224 different tissues as part of a fusion construct and translate into functional proteins in grafted *A.*

225 *thaliana* plants indicating that these tRNA were able to confer mobility to these transcripts.  
226 (Zhang et al. 2016). This suggests a non-autonomous role for dicistronic tRNAs in delivering  
227 mRNA transcripts to distantly located tissues. A recent study also revealed that mobile RNA  
228 transcripts are enriched in the modified base 5-methylcytosine (m<sup>5</sup>C), indicating a role of RNA  
229 cytosine methylation in systemic RNA movement (Yang et al. 2019). In plants, tRNA and  
230 mRNA m<sup>5</sup>C methylation is mediated by the methyltransferases DNMT2 and TRM4B (Burgess et  
231 al. 2015; Cui et al. 2017; David et al. 2017) and loss of these enzymes was demonstrated to  
232 impair transcript mobility (Yang et al. 2019). Future studies will need to be undertaken to  
233 determine if the dicistronic tRNAs identified in this study also confer mRNA mobility and to  
234 assess the role of cytosine methylation in mRNA transport in grapevine.

235 Interestingly, for four of the 19 dicistronic candidates we also observed sequence conservation  
236 between *A. thaliana* and *V. vinifera* for the protein coding gene and the adjacently co-transcribed  
237 tRNA genes. The dicistronic activity at these conserved loci may provide an explanation of why  
238 such syntenic clusters are conserved through evolution and suggests that these transcripts may  
239 have an important functional role.

240 Of the 19 dicistronic tRNA genes identified in the *Vitis vinifera* genome, 18 were located fewer  
241 than 1000 base pairs from the co-transcribed protein coding gene (median distance 133 bp). Our  
242 findings suggest that tRNA genes and protein coding genes need to be closely positioned in the  
243 genome in order to form dicistronic transcripts. Similar observations were obtained in *A.*  
244 *thaliana*, where the majority of the previously identified PCGs forming part of mobile dicistronic  
245 transcripts were located less than 200 bp from their partner tRNA (Zhang et al. 2016). This  
246 genomic proximity rule has been found to extend to the dicistronic tRNA-snoRNA genes that  
247 have been identified in higher plants (*A. thaliana*, *M. truncatula*, *P. trichocarpa*, *O. sativa* and *B.*

248 *distachyon*) in which the intergenic region ranged between 1 to 16 base pair (Michaud et al.  
249 2011).

250 Previous studies have indicated that a large proportion of mobile transcripts are also highly  
251 abundant (Calderwood et al. 2016; Thieme et al. 2015). This suggests that passive diffusion of  
252 these transcripts through the phloem may contribute to their mobility. A significant proportion  
253 (11.4%) of these transcripts was subsequently shown to be dicistronically associated with tRNA  
254 (Zhang et al. 2016). However, when we assessed the expression levels of mRNA and tRNA that  
255 formed dicistronic transcripts in grapevine, we did not observe higher abundance of these  
256 transcripts in either tissue analysed. Thus, in our study, the expression level of the tRNA and  
257 mRNA was not a good indicator of the formation of dicistronic transcripts.

258 In eukaryotes, tRNA and mRNA are transcribed by different types of RNA polymerase. RNA  
259 polymerase II (Pol II) transcribes protein coding genes and RNA polymerase III (Pol III) for a  
260 variety of genes that generally encode for RNAs with catalytic activity such as tRNA (Schramm  
261 and Hernandez 2002). Results from Kruszka et al. (2003) suggested that, in *A. thaliana*,  
262 dicistronic tRNA-snoRNA are transcribed by Pol III from the tRNA gene promoter. However,  
263 Pol III transcribes genes shorter than 400 base pairs (Schramm and Hernandez 2002) and the  
264 dicistronic transcripts identified in our study were considerably longer (between 1486 to 6002  
265 bp) suggesting Pol III may not be co-transcribing these transcripts. A comparative analysis of  
266 flowering species showed a poly-T stretch immediately downstream of  $\geq 90\%$  of tRNA genes  
267 (Michaud et al. 2011). Additionally, this study reported that the few tRNAs lacking poly-Ts were  
268 capable of forming dicistronic transcript with snoRNAs. The authors hypothesized that the lack  
269 of the poly T transcriptional termination signal could be a possible explanation for why these  
270 transcripts were transcribed as a single unit by Pol III. Sequence analysis of the upstream and

271 downstream sequences of the dicistronic tRNAs identified in our study revealed canonical  
272 elements previously associated with transcription start and termination (Michaud et al. 2011;  
273 Yukawa et al. 2000). In particular, all dicistronic tRNA transcripts we identified had a poly-T  
274 termination signal suggesting the transcriptional read-through mechanism for these transcripts is  
275 different from tRNA-snoRNAs. It remains to be determined whether one of, or both polymerases  
276 are involved in transcribing tRNA-mRNA dicistronic transcripts.

277 The expression patterns of all genomic features studied (i.e. tRNAs, PCGs, and intergenic  
278 regions (considered a proxy for dicistronic tRNA-mRNA transcripts) were found to be organ  
279 specific and sensitive to regional environmental differences. The effect of organ and  
280 environment on PCG and tRNA gene expression has been extensively studied before in  
281 grapevine (Bester et al. 2017; Dal Santo et al. 2013; Liu et al. 2012; Pontin et al. 2010; Sun et al.  
282 2015a). Special effort has been put into deciphering the effect that the growing environment has  
283 on fruit quality traits associated with wine regionality (Jackson and Lombard 1993; van Leeuwen  
284 2009; Zsófi et al. 2011). However, the effect that the environment and tissue have on tRNA  
285 expression and on dicistronic transcript expression has not been previously described. Our results  
286 show that the expression patterns of dicistronic transcript-forming tRNA genes mimic those of  
287 all expressed tRNA (Supplemental Fig S5). We also found that the expression of dicistronic  
288 tRNA-mRNAs, measured as the expression of the intergenic region, showed a higher correlation  
289 with that of dicistronic tRNA than with that of dicistronic PCGs in both tissues. Although this  
290 correlation was only statistically significant in leaves, the lack of statistical significance in berry  
291 samples could be due to the low number of dicistronic transcripts identified in berries compared  
292 to leaves (9 vs 16 respectively). Taken collectively, our results suggest that environmentally

293 induced dicistronic tRNA-mRNA expression is, at least partially, directed by the mechanisms  
294 regulating tRNA expression.

295 Prior to this work, dicistronic transcripts had been found in a handful of plant species grown  
296 under laboratory conditions. Comparative analysis of dicistronic transcripts in grapevine and *A.*  
297 *thaliana* indicate that the genomic clustering of the tRNA and protein coding gene is  
298 evolutionarily conserved between both species. A better understanding of their prevalence across  
299 the plant kingdom is needed to begin to understand the biological roles that these types of  
300 transcripts may play in plants. We provide here the first evidence for discistronic transcription in  
301 a commercially important crop species grown in field conditions, and highlight that differential  
302 tRNA expression could be relevant for differential dicistronic transcript formation. Our approach  
303 can be utilized to survey distribution patterns of dicistronic transcripts in different plant species  
304 and tissues which will help elucidate the molecular function of these transcripts in plant  
305 signalling.

## 306 **Material and methods**

### 307 **Sampling material**

308 Tissues were sampled from own-rooted grapevines (*Vitis vinifera*) cv. Shiraz from 22  
309 commercial vineyards located in the Barossa wine zone (South Australia, Australia). Vineyards  
310 were selected as part of a larger study of Barossa Terroir (Xie et al. 2017). Vineyards were  
311 chosen to be representative of the climate, soil and management practices that are used in the  
312 different Barossa sub-regions. These sub-regions are the Eden Valley (EV) (3 vineyards),  
313 Northern Grounds (NG) (4 vineyards), Central Grounds (CG) (4 vineyards), Southern Grounds  
314 (SG) (3 vineyards), Eastern Edge (EE) (4 vineyards) and Western Ridge (WR) (4 vineyards).

315 Leaf and a berry bunches were collected from nine plants in each of three rows in each vineyard  
316 (total of 198 plants) during the 2016 growing season. The first fully expanded leaf at budburst  
317 (E-L 7) (Coombe 1995) was collected from three nodes per plant and pooled into a single sample  
318 per plant. Berries were collected at veraison (E-L 35) (Coombe 1995) from three different  
319 bunches per plant (i.e. three berries per bunch). All samples were taken before dawn (between  
320 10:00 pm and sunrise) to minimise variability associated with differences in plant water status  
321 (Williams and Araujo 2002). Samples were snap-frozen in liquid nitrogen in the vineyards and  
322 stored at -80°C.

### 323 **RNA extraction and RNA-seq library preparation**

324 Total RNA was extracted from each sample using the Spectrum Plant Total RNA kit (Sigma-  
325 Aldrich) following the manufacturer's instructions and including DNase treatment. Three  
326 samples per vineyard were generated by pooling 2 µg of total RNA from three plants from the  
327 same row in the vineyard for a total of 66 pools. Ribosome was depleted in 6 µg of RNA from  
328 each pool using the Dynabeads mRNA purification kit (Ambion, Invitrogen) following the  
329 manufacturer's instructions. Ribosomal depleted RNA (25 ng per pool) was used as input for  
330 library preparation using the NEBNext Ultra RNA Library Prep Kit for Illumina (New England  
331 Biolabs Inc). Libraries were sequenced using Illumina NextSeq High Output 75 bp pair-end  
332 (Illumina Inc., San Diego, CA, United States) at the Australian Genome Research Facility  
333 (Adelaide, SA, Australia). Reads were trimmed and filtered using AdapterRemoval v2.2.1  
334 (Schubert et al. 2016) using default settings. Alignment of trimmed reads to the *Vitis vinifera*  
335 genome reference IGGP\_12X obtained from EnsemblPlants 36 was performed using Hisat2  
336 v2.1.0 (Kim et al. 2015). BAM files from samples from the same vineyard were merged, sorted  
337 and indexed using SAMtools v1.8 (Li et al. 2009). Mapped reads were counted to genomic



338 features using featureCounts v1.5.2 (Liao et al. 2014), with the minimum mapping quality score  
339 for a read to be assigned to a feature was set to 10 (Liao et al. 2013). The merged, sorted and  
340 indexed BAM files were then directly input into the R environment in order to identify the  
341 dicistronic tRNA-mRNA transcripts.

### 342 ***In silico* detection of dicistronic tRNA-mRNA transcripts**

343 DiRT (**D**icistronic **R**NA **T**ranscripts) is a custom pipeline implemented in the R environment and  
344 source codes are available at GitHub (<https://github.com/CharlotteSai/DiRT>). While the pipeline  
345 was developed for analysing grapevine RNA-seq data, it can be adapted for use in other species  
346 provided a genomic tRNA annotation is available. Firstly, protein coding gene (PCG)  
347 information and coordinates were downloaded from Ensembl Plants (release 45)  
348 ([http://plants.ensembl.org/Vitis\\_vinifera/Info/Index](http://plants.ensembl.org/Vitis_vinifera/Info/Index)) and the chromosomal coordinates of tRNA  
349 genes were extracted from the Genomic tRNA database using tRNAscan-SE based on predicted  
350 structure analysis (<http://gtrnadb.ucsc.edu/GtRNAdb2/genomes/eukaryota/Vvini/>). We used  
351 BEDTools version 2.25 (Quinlan and Hall 2010) to determine the relative location of PCGs in  
352 relation to all tRNA genes. Predicted tRNAs overlapping with PCGs were discarded for further  
353 analysis. tRNAs expressed (i.e. above 1 raw read) in leaf and berry samples were identified using  
354 GenomicRanges (Lawrence et al. 2013). To infer putative co-transcription, first we filtered the  
355 RNA-seq data for genomic regions where both tRNA loci and closest neighbouring gene were  
356 transcribed (Raw read  $\geq 1$  for tRNAs and raw read  $\geq 10$  in PCGs), independently of their  
357 DNA-strand. In order to identify region-specific putative dicistronic transcripts, each Barossa  
358 sub-region was interrogated separately.

359 The selected candidate tRNA-mRNA transcripts were then scanned for dicistronic transcripts.  
360 We demanded that, first; the sequencing coverage of the intergenic region must be significantly

361 higher than the intron closest to the intergenic region and the second intron closest to intergenic  
362 region. To achieve this, reads for each base of the intergenic region, the closest intron and the  
363 second closest intron were counted by the coverage method from the *GenomicRanges* package  
364 (Lawrence et al. 2013) using merged BAM files for each region to obtain total coverage for each  
365 region. Then significant differences in average coverage between the intergenic region and the  
366 two closest introns were determined by a t-test including all regions as biological replicates. The  
367 complete set of p-values were adjusted using the Benjamini-Hochberg false discovery rate (FDR)  
368 (Benjamini and Hochberg 1995) and intergenic regions with higher mean coverage than both  
369 introns, and an FDR-adjusted p-value  $< 0.05$  were included for subsequent steps of the pipeline.

370 tRNA-mRNA transcripts passing the first condition were further filtered for those with  
371 uninterrupted sequencing coverage spanning the tRNA, the intergenic region and the mRNA by  
372 selecting candidates with at least one count for every base in the intergenic region. This  
373 condition was implemented to make sure that at least one entire molecule of the dicistronic  
374 transcript had been potentially produced.

375 Finally, dicistronic candidates with continuous coverage in the intergenic region were manually  
376 inspected using IGV (Robinson et al. 2011) for visual validation of continuous coverage. The  
377 candidates passing both of the t-tests and continuously coverage examination were deemed  
378 putative tRNA-mRNA dicistronic transcripts. Multidimensional scaling (MDS) were analysed in  
379 the R environment using the function *plotMDS* from the *limma* package (Ritchie et al. 2015).

### 380 **RT-PCR confirmation**

381 Complementary DNA was synthesized from the same total RNA used for the RNA-seq using  
382 SuperScript IV first strand synthesis system (Invitrogen, 18091050) following the

383 manufacturer's instructions. Complementary DNA was synthesised using gene specific reverse  
384 primers that aligned to the second exon for each candidate gene (15s0046g02860-Reverse and  
385 18s0001g09050-Reverse) (+RT) and the reverse primer of the gene Elongation Factor 1-alpha  
386 (EF1a) as a positive control. Negative controls for the cDNA synthesis (-RT) in which reverse  
387 transcriptase enzyme was omitted were included for each of the dicistronic candidate. Resulting  
388 cDNA was diluted 1:10 and 2 µl was used for RT-PCR. The RT-PCR reaction was conducted  
389 using Kappa Taq PCR Kit (Kappa Biosystem, KK1020) following manufacture instructions. The  
390 amplification program used was 95°C for 3 min, 37 cycles at 95°C for 30 sec followed by 60°C  
391 for 30 sec and 72°C for 50 sec and finally 72°C per 2 min. For the candidate tRNA<sup>ValCAC1.7</sup>-  
392 VIT\_15s0046g02860 we used primers tRNA-Val-forward and Intergenic-tRNAVal-reverse (376  
393 bp). For candidate tRNA<sup>ProTGG2.9</sup>- VIT\_18s0001g09050 primers tRNA-Pro-forward and  
394 Intergenic-tRNAPro-reverse (172 bp) were used. Negative control for the PCR reaction (-Ctr)  
395 contained all components for the reaction except the cDNA template. RT-PCR products were  
396 analysed by agarose gel electrophoresis and SYBR Safe DNA gel staining (ThermoFisher  
397 Scientific, S33102). RT-PCR products were purified using PCR Clean-up (Macherey-Nagel,  
398 740609.250) following the manufacturer's instructions. Sanger sequencing was performed at the  
399 Australian Genome Research Facility. Oligonucleotides used for RT-PCR are listed in  
400 Supplemental Table S6. Matching of the sequencing results for both putative dicistronic pairs  
401 and the expected sequence of each locus was confirmed using BLAST (blastn) with default  
402 settings (Zhang et al. 2000).

### 403 **Regional effect on the expression of dicistronic tRNA:mRNAs**

404 To determine the effect of the region of origin on dicistronic tRNA:mRNAs, we independently  
405 compared the expression levels of all three components of the identified dicistronic transcripts

406 (i.e. tRNAs, intergenic regions and PCGs). Similarly, the regional expression levels of all  
407 expressed tRNAs were compared. Briefly, mapped reads for each selected genomic feature  
408 obtained from featureCounts, were analysed in the R environment for plotting the gene  
409 expression through heatmaps. The expression of all tRNA, dicistronic tRNAs, intergenic region  
410 and the dicistronic genes (logCPM) were plotted using the pheatmap (Kolde 2015). Local Fisher  
411 LFDA was performed in the R environment using the package *lfda* (Sugiyama 2006) to the  
412 expression (logCPM) values of all tRNA, dicistronic tRNAs, intergenic region and the  
413 dicistronic genes. In order to determine whether primary mRNA or the tRNA is driving the  
414 expression of candidate dicistronic tRNA-mRNA transcripts, we carried out Pearson correlation  
415 analyses between the expression of tRNA vs intergenic region and PCGs vs intergenic region for  
416 each dicistronic candidate identified. Pearson correlation analysis ( $p$ -value  $< 0.05$ ) was  
417 performed using the R function *cor.test()*. Read counts of the intergenic regions were used as a  
418 proxy to define the expression of dicistronic transcripts. The rationale behind this lies on the  
419 assumption that reads mapping to the intergenic region can only be the result of the sequencing  
420 of a dicistronic RNA molecule, while reads mapping to tRNA genes and PCGs could result both  
421 from the expression of monocistronic and dicistronic transcripts (i.e. tRNA genes and PCGs  
422 pairs forming two independent RNA molecules or a single RNA molecules respectively) (Figure  
423 6).

## 424 **Gene analyses**

425 A bar plot was made to represent the distance (bp) between the tRNA and its proximal gene.  
426 Pairs of expressed tRNA-mRNA were split in two groups depending if they formed dicistronic or  
427 monocistronic transcripts. A non-overlapping sliding window approach (200bp) was used to  
428 count the number of pairs of genes of each type. Expression of the dicistronic genes and

429 dicistronic tRNA was assessed by plotting their expression values against the distribution of the  
430 total gene expression for each tissue from the RNA-seq data. Gene annotation for dicistronic  
431 genes was obtained from EnsemblPlants release 45  
432 ([http://plants.ensembl.org/Vitis\\_vinifera/Info/Index](http://plants.ensembl.org/Vitis_vinifera/Info/Index)), BLASTP search from NCBI  
433 (<https://blast.ncbi.nlm.nih.gov/Blast.cgi>), from the grapevine V1 annotation of PN40024 (Jaillon  
434 et al. 2007) and from the Additional file 1 of Cramer et al. (2020). Protein information and gene  
435 ontology terms were obtained from UniProt (<https://www.uniprot.org/uniprot>). GO enrichment  
436 analysis was performed from Gene Ontology Consortium (<http://geneontology.org/>) with default  
437 settings.

#### 438 **Motif analysis**

439 Upstream and downstream sequence from the dicistronic tRNA was obtained from Genomic  
440 tRNA data and analysed in Weblogo (Crooks et al. 2004) for sequence analysis using default  
441 settings.

#### 442 **Acknowledgments**

443 This study was funded through a Pilot Program in Genomic Applications in Agriculture and  
444 Environment Sectors jointly supported by the University of Adelaide and the Australian Genome  
445 Research Facility Ltd. PJF was supported by Graduate Research Scholarships from Wine  
446 Australia (PH1503) and the University of Adelaide. NS was supported by a summer scholarship  
447 from the ARC Centre of Excellence in Plant Energy Biology (CE1400008). Dr Lopez is  
448 currently partially supported by the National Institute of Food and Agriculture, U.S. Department  
449 of Agriculture, Hatch Program number 2352987000. We thank the Barossa Grounds Project and  
450 the growers who allowed us to collect samples and supplied information about their vineyards.  
451 We thank Kendall Corbin for performing the DNA extraction of the leaf samples. We thank

452 Cassandra Collins for the experimental design and collection of the plant material. We thank  
453 Roberta DeBei, Sandra Milena Mantilla, Annette James, and Valentin Olek who helped with the  
454 sample collection. We thank Stephen Tyerman for his contribution in the development of DiRT.  
455 We thank Timothy Cavagnaro and Andrew Metcalfe for their contribution in the experimental  
456 design.

#### 457 **Availability of data and materials**

458 The full sequencing data are available on SRA database under the accession number  
459 PRJNA591273.

#### 460 **References**

461 Alabi OJ, Zheng Y, Jagadeeswaran G, Sunkar R, Naidu RA. 2012. High-throughput sequence  
462 analysis of small RNAs in grapevine (*Vitis vinifera* L.) affected by grapevine leafroll  
463 disease. *Mol Plant Pathol* **13**: 1060–1076.

464 Banerjee R, Chen S, Dare K, Gilreath M, Praetorius-Ibba M, Raina M, Reynolds NM, Rogers T,  
465 Roy H, Yadavalli SS, et al. 2010. tRNAs: cellular barcodes for amino acids. *FEBS Lett*  
466 **584**: 387–395.

467 Barkan A. 2011. Expression of plastid genes: organelle-specific elaborations on a prokaryotic  
468 scaffold. *Plant Physiol* **155**: 1520–1532.

469 Benjamini Y, Hochberg Y. 1995. Controlling the False Discovery Rate: A Practical and  
470 Powerful Approach to Multiple Testing. *J R Statist Soc* **57**: 239–300.

471 Bester R, Burger JT, Maree HJ. 2017. The small RNA repertoire in phloem tissue of three *Vitis*  
472 *vinifera* cultivars. *Plant Gene* **10**: 60–73.

473 Burgess AL, David R, Searle IR. 2015. Conservation of tRNA and rRNA 5-methylcytosine in  
474 the kingdom Plantae. *BMC Plant Biol* **15**: 199.

475 Calderwood A, Kopriva S, Morris RJ. 2016. Transcript Abundance Explains mRNA Mobility  
476 Data in *Arabidopsis thaliana*. *Plant Cell* **28**: 610–615.

477 Chan PP, Lowe TM. 2016. GtRNadb 2.0: an expanded database of transfer RNA genes  
478 identified in complete and draft genomes. *Nucleic Acids Res* **44**: D184–9.

- 479 Coombe BG. 1995. Growth Stages of the Grapevine: Adoption of a system for identifying  
480 grapevine growth stages. *Aust J Grape Wine Res* **1**: 104–110.
- 481 Cramer GR, Cochetel N, Ghan R, Destrac-Irvine A, Delrot S. 2020. A sense of place: transcriptomics  
482 identifies environmental signatures in Cabernet Sauvignon berry skins in the late stages of  
483 ripening. *BMC Plant Biol* **20**: 41.
- 484 Crooks GE, Hon G, Chandonia JM, Brenner SE. 2004. WebLogo: a sequence logo generator.  
485 *Genome Res* **14**: 1188–1190.
- 486 Cui X, Liang Z, Shen L, Zhang Q, Bao S, Geng Y, Zhang B, Leo V, Vardy LA, Lu T, et al.  
487 2017. 5-Methylcytosine RNA Methylation in Arabidopsis Thaliana. *Mol Plant* **10**: 1387–  
488 1399.
- 489 Dal Santo S, Tornielli GB, Zenoni S, Fasoli M, Farina L, Anesi A, Guzzo F, Delledonne M,  
490 Pezzotti M. 2013. The plasticity of the grapevine berry transcriptome. *Genome Biol* **14**:  
491 r54.
- 492 David R, Burgess A, Parker B, Li J, Pulsford K, Sibbritt T, Preiss T, Searle IR. 2017.  
493 Transcriptome-Wide Mapping of RNA 5-Methylcytosine in Arabidopsis mRNAs and  
494 Noncoding RNAs. *Plant Cell* **29**: 445–460.
- 495 Francklyn CS, Minajigi A. 2010. tRNA as an active chemical scaffold for diverse chemical  
496 transformations. *FEBS Lett* **584**: 366–375.
- 497 Guan D, Yan B, Thieme C, Hua J, Zhu H, Boheler KR, Zhao Z, Kragler F, Xia Y, Zhang S.  
498 2017. PlaMoM: a comprehensive database compiles plant mobile macromolecules.  
499 *Nucleic Acids Res* **45**: D1021–D1028.
- 500 Han J, Fang J, Wang C, Yin Y, Sun X, Leng X, Song C. 2014. Grapevine microRNAs  
501 responsive to exogenous gibberellin. *BMC Genomics* **15**: 111.
- 502 Jackson DI, Lombard PB. 1993. Environmental and Management Practices Affecting Grape  
503 Composition and Wine Quality - A Review. *Am J Enol Vitic* **44**: 409-430  
504 Jaillon O, Aury J-M, Noel B, Policriti A, Clepet C, Casagrande A, Choisne N, Aubourg S, Vitulo N,  
505 Jubin C, et al. 2007. The grapevine genome sequence suggests ancestral hexaploidization  
506 in major angiosperm phyla. *Nature* **449**: 463–467.
- 507 Karginov TA, Pastor DPH, Semler BL, Gomez CM. 2017. Mammalian Polycistronic mRNAs  
508 and Disease. *Trends Genet* **33**: 129–142.
- 509 Kersey PJ, Allen JE, Allot A, Barba M, Boddu S, Bolt BJ, Carvalho-Silva D, Christensen M,  
510 Davis P, Grabmueller C, et al. 2018. Ensembl Genomes 2018: an integrated omics  
511 infrastructure for non-vertebrate species. *Nucleic Acids Res* **46**: D802–D808.



- 512 Kim D, Langmead B, Salzberg SL. 2015. HISAT: a fast spliced aligner with low memory  
513 requirements. *Nat Methods* **12**: 357–360.
- 514 Kolde R. 2015. pheatmap: Pretty Heatmaps. R package version 1.0.8.
- 515 Kruszka K, Barneche F, Guyot R, Ailhas J, Meneau I, Schiffer S, Marchfelder A, Echeverría M.  
516 2003. Plant dicistronic tRNA-snoRNA genes: a new mode of expression of the small  
517 nucleolar RNAs processed by RNase Z. *EMBO J* **22**: 621–632.
- 518 Lawrence M, Huber W, Pagès H, Aboyoun P, Carlson M, Gentleman R, Morgan MT, Carey VJ.  
519 2013. Software for computing and annotating genomic ranges. *PLoS Comput Biol* **9**:  
520 e1003118.
- 521 Leader DJ, Clark GP, Watters J, Beven AF, Shaw PJ, Brown JW. 1997. Clusters of multiple  
522 different small nucleolar RNA genes in plants are expressed as and processed from  
523 polycistronic pre-snoRNAs. *EMBO J* **16**: 5742–5751.
- 524 Li H, Handsaker B, Wysoker A, Fennell T, Ruan J, Homer N, Marth G, Abecasis G, Durbin R,  
525 1000 Genome Project Data Processing Subgroup. 2009. The Sequence Alignment/Map  
526 format and SAMtools. *Bioinformatics* **25**: 2078–2079.
- 527 Liao Y, Smyth GK, Shi W. 2014. featureCounts: an efficient general purpose program for  
528 assigning sequence reads to genomic features. *Bioinformatics* **30**: 923–930.
- 529 Liao Y, Smyth GK, Shi W. 2013. The Subread aligner: fast, accurate and scalable read mapping  
530 by seed-and-vote. *Nucleic Acids Res* **41**: e108.
- 531 Liu G-T, Wang J-F, Cramer G, Dai Z-W, Duan W, Xu H-G, Wu B-H, Fan P-G, Wang L-J, Li S-  
532 H. 2012. Transcriptomic analysis of grape (*Vitis vinifera* L.) leaves during and after  
533 recovery from heat stress. *BMC Plant Biol* **12**: 174.
- 534 Merchan F, Boualem A, Crespi M, Frugier F. 2009. Plant polycistronic precursors containing  
535 non-homologous microRNAs target transcripts encoding functionally related proteins.  
536 *Genome Biol* **10**: R136.
- 537 Michaud M, Cognat V, Duchêne A-M, Maréchal-Drouard L. 2011. A global picture of tRNA  
538 genes in plant genomes. *Plant J* **66**: 80–93.
- 539 Pantaleo V, Szittyá G, Moxon S, Miozzi L, Moulton V, Dalmay T, Burgyan J. 2010.  
540 Identification of grapevine microRNAs and their targets using high-throughput  
541 sequencing and degradome analysis. *Plant J* **62**: 960–976.
- 542 Pontin MA, Piccoli PN, Francisco R, Bottini R, Martinez-Zapater JM, Lijavetzky D. 2010.  
543 Transcriptome changes in grapevine (*Vitis vinifera* L.) cv. Malbec leaves induced by  
544 ultraviolet-B radiation. *BMC Plant Biol* **10**: 224.



- 545 Qu G, Kruszka K, Plewka P, Yang S-Y, Chiou T-J, Jarmolowski A, Szweykowska-Kulinska Z,  
546 Echeverria M, Karlowski WM. 2015. Promoter-based identification of novel non-coding  
547 RNAs reveals the presence of dicistronic snoRNA-miRNA genes in *Arabidopsis thaliana*.  
548 *BMC Genomics* **16**: 1009.
- 549 Quinlan AR, Hall IM. 2010. BEDTools: a flexible suite of utilities for comparing genomic  
550 features. *Bioinformatics* **26**: 841–842.
- 551 Ritchie ME, Phipson B, Wu D, Hu Y, Law CW, Shi W, Smyth GK. 2015. limma powers  
552 differential expression analyses for RNA-sequencing and microarray studies. *Nucleic  
553 Acids Res* **43**: e47.
- 554 Robinson JT, Thorvaldsdóttir H, Winckler W, Guttman M, Lander ES, Getz G, Mesirov JP.  
555 2011. Integrative genomics viewer. *Nat Biotechnol* **29**: 24–26.
- 556 Robinson S, Sandercock N. 2014. An analysis of climate, soil and topographic information to aid  
557 the understanding of Barossa terroir – A Barossa Grounds Project, PIRSA Spatial  
558 Information Services, Government of South Australia.
- 559 Schramm L, Hernandez N. 2002. Recruitment of RNA polymerase III to its target promoters.  
560 *Genes Dev* **16**: 2593–2620.
- 561 Schubert M, Lindgreen S, Orlando L. 2016. AdapterRemoval v2: rapid adapter trimming,  
562 identification, and read merging. *BMC Res Notes* **9**: 88.
- 563 Sugita M, Sugiura M. 1996. Regulation of gene expression in chloroplasts of higher plants. *Plant  
564 Mol Biol* **32**: 315–326.
- 565 Sugiyama M. 2006. Local Fisher discriminant analysis for supervised dimensionality reduction.  
566 In *Proceedings of the 23rd international conference on Machine learning' - ICML '06*,  
567 pp. 905–912, ACM Press, New York, New York, USA.
- 568 Sun R, He F, Lan Y, Xing R, Liu R, Pan Q, Wang J, Duan C. 2015a. Transcriptome comparison  
569 of Cabernet Sauvignon grape berries from two regions with distinct climate. *J Plant  
570 Physiol* **178**: 43–54.
- 571 Sun X, Fan G, Su L, Wang W, Liang Z, Li S, Xin H. 2015b. Identification of cold-inducible  
572 microRNAs in grapevine. *Front Plant Sci* **6**: 595.
- 573 Tang H, Bowers JE, Wang X, Ming R, Alam M, Paterson AH. 2008. Synteny and collinearity in  
574 plant genomes. *Science* **320**: 486–488.
- 575 Thieme CJ, Rojas-Triana M, Stecyk E, Schudoma C, Zhang W, Yang L, Miñambres M, Walther  
576 D, Schulze WX, Paz-Ares J, et al. 2015. Endogenous *Arabidopsis* messenger RNAs  
577 transported to distant tissues. *Nat Plants* **1**: 15025.

- 578 Van Leeuwen C. 2009. Soils and Terroir Expression in Wines. In *Soil and Culture* (eds. E.R.  
579 Landa and C. Feller), pp. 453–465, Springer Netherlands, Dordrecht.
- 580 Wang C, Wang X, Kibet NK, Song C, Zhang C, Li X, Han J, Fang J. 2011. Deep sequencing of  
581 grapevine flower and berry short RNA library for discovery of novel microRNAs and  
582 validation of precise sequences of grapevine microRNAs deposited in miRBase. *Physiol*  
583 *Plant* **143**: 64–81.
- 584 Wickham H. 2016. *ggplot2: Elegant Graphics for Data Analysis*. 2, illustrated. Springer-Verlag  
585 New York.
- 586 Williams LE, Araujo FJ. 2002. Correlations among Predawn Leaf, Midday Leaf, and Midday  
587 Stem Water Potential and their Correlations with other Measures of Soil and Plant Water  
588 Status in *Vitis vinifera*. *J Amer Soc Hort Sci* **127**: 448–454.
- 589 Xie H, Konate M, Sai N, Tesfamicael KG, Cavagnaro T, Gilliham M, Breen J, Metcalfe A,  
590 Stephen JR, De Bei R, et al. 2017. Global DNA Methylation Patterns Can Play a Role in  
591 Defining Terroir in Grapevine (*Vitis vinifera* cv. Shiraz). *Front Plant Sci* **8**: 1860.
- 592 Yang Y, Mao L, Jittayasothorn Y, Kang Y, Jiao C, Fei Z, Zhong G-Y. 2015. Messenger RNA  
593 exchange between scions and rootstocks in grafted grapevines. *BMC Plant Biol* **15**: 251.
- 594 Yang L, Perrera V, Saplaoura E, Apelt F, Bahin M, Kramdi A, Olas J, Mueller-Roeber B,  
595 Sokolowska E, Zhang W, et al. 2019. m5C Methylation Guides Systemic Transport of  
596 Messenger RNA over Graft Junctions in Plants. *Curr Biol* **29**: 2465–2476.e5.
- 597 Yukawa Y, Sugita M, Choisne N, Small I, Sugiura M. 2000. The TATA motif, the CAA motif  
598 and the poly(T) transcription termination motif are all important for transcription re-  
599 initiation on plant tRNA genes. *Plant J* **22**: 439–447.
- 600 Zhang W, Thieme CJ, Kollwig G, Apelt F, Yang L, Winter N, Andresen N, Walther D, Kragler  
601 F. 2016. tRNA-Related Sequences Trigger Systemic mRNA Transport in Plants. *Plant*  
602 *Cell* **28**: 1237–1249.
- 603 Zhang Z, Schwartz S, Wagner L, Miller W. 2000. A greedy algorithm for aligning DNA  
604 sequences. *J Comput Biol* **7**: 203–214.
- 605 Zsófi Z, Tóth E, Rusjan D, Bálo B. 2011. Terroir aspects of grape quality in a cool climate wine  
606 region: Relationship between water deficit, vegetative growth and berry sugar  
607 concentration. *Sci Hortic (Amsterdam)* **127**: 494–499.
- 608

609 **Table**

610 **Table 1.** Dicistronic tRNA-mRNA candidates identified from RNA-seq data in leaves and  
611 berries of grapevine.

| tRNA ID          | Gene ID (Ensembl accession number) | Tissue(s)      |
|------------------|------------------------------------|----------------|
| tRNA-Phe-GAA-1-4 | VIT_07s0005g02200                  | Leaf           |
| tRNA-Ala-AGC-1-7 | VIT_14s0066g02600                  | Leaf           |
| tRNA-Pro-CGG-2-2 | VIT_14s0060g01370                  | Leaf           |
| tRNA-Arg-TCG-2-2 | VIT_09s0002g04750                  | Leaf           |
| tRNA-Gly-GCC-1-1 | VIT_02s0154g00160                  | Leaf           |
| tRNA-Gly-GCC-1-5 | VIT_07s0005g02990                  | Leaf           |
| tRNA-Gly-GCC-1-6 | VIT_08s0058g00460                  | Leaf           |
| tRNA-Val-CAC-1-7 | VIT_15s0046g02860                  | Leaf           |
| tRNA-Asn-GTT-2-2 | VIT_18s0001g12620                  | Leaf           |
| tRNA-Met-CAT-1-3 | VIT_07s0129g00230                  | Leaf           |
| tRNA-His-GTG-8-1 | VIT_17s0000g06990                  | Leaf and Berry |
| tRNA-Gly-TCC-1-6 | VIT_13s0064g00200                  | Leaf and Berry |
| tRNA-Thr-AGT-1-4 | VIT_00s0322g00020                  | Leaf and Berry |
| tRNA-Ile-AAT-3-1 | VIT_04s0023g03700                  | Leaf and Berry |
| tRNA-Pro-TGG-2-9 | VIT_18s0001g09050                  | Leaf and Berry |
| tRNA-Phe-GAA-1-4 | VIT_07s0005g02210                  | Leaf and Berry |
| tRNA-Leu-TAA-2-3 | VIT_08s0007g03950                  | Berry          |
| tRNA-Gly-CCC-1-3 | VIT_19s0177g00220                  | Berry          |
| tRNA-Thr-AGT-2-1 | VIT_05s0077g01490                  | Berry          |

612

613

## 614 **Figure Legends**

615 **Figure 1.** Geographical location of grapevine tissue samples analysed in this study. Leaf and  
616 berry samples were harvested from selected vineyards from the Barossa wine region, Australia.  
617 Northern Grounds (NG, blue) Central Grounds (CG, green), Southern Grounds (SG, yellow),  
618 Western Ridge (WR, purple), Eastern Edge (EE, red) and Even Valley (EV, orange).

619 **Figure 2.** Schematic workflow of the DiRT pipeline to identify dicistronic candidates from  
620 RNA-seq data. tRNA gene and protein coding gene coordinates were retrieved from GtRNADB  
621 and Ensembl Plants respectively. tRNA-protein coding gene pairs that occupied contiguous  
622 spaces in the genome were assembled and selected for subsequent analysis if they were  
623 transcribed based on RNA-seq reads (Raw read  $\geq 1$  for tRNAs and raw read  $\geq 10$  in PCGs).  
624 Dicistronic tRNA-mRNA are identified by assessing active transcription of the intergenic region.  
625 Candidate tRNA-mRNA are selected if the intergenic regions had significantly higher expression  
626 (FDR  $< 0.05$ ) than the closest two introns. Pairs of tRNA-gene are classified as putatively  
627 dicistronic tRNA-mRNA if the intergenic region showed continuous sequencing coverage  
628 between the tRNA and the mRNA of the protein coding gene.

629 **Figure 3:** Assessing active transcription of intergenic region of putative dicistronic tRNA-  
630 mRNAs transcripts from RNA-seq data. A) Gene model of dicistronic tRNA-mRNA transcript in  
631 which the intergenic region was expressed B) Average read coverage of the intergenic region  
632 versus the closest two introns of a tRNA-mRNA combination that passed B) (tRNA<sup>Gly-GCC-1-6</sup>  
633 VIT\_08s0058g00460) and failed C) (tRNA<sup>Tyr-GTA-4-1</sup> VIT\_00s0505g00030) the t-test (p-value  $<$   
634 0.05). C) Genome browser view of a candidate dicistronic tRNA-mRNA formed by tRNA<sup>Gly-TCC-</sup>  
635 <sup>1-6</sup> and VIT\_13s0064g00200 identified using the DiRT pipeline.

636

637 **Figure 4.** RT-PCR confirmation of identified dicistronic transcripts. Model of putative  
638 dicistronic tRNA-mRNA transcript showing primers used for cDNA synthesis (cDNA rev.) and  
639 for the PCR reaction (RT-PCR For and RT-PCR Rev). Confirmation of actively transcribed  
640 intergenic region through RT-PCR for candidates A) tRNA<sup>ValCAC</sup>-VIT\_15s0046g02860 (376 bp)  
641 and B) tRNA<sup>ProTGG</sup>-VIT\_18s0001g09050 (172 bp). +RT: cDNA as template, gDNA: genomic  
642 DNA was used as a control, -RT: RT-PCR negative control, EF1a: Elongation Factor 1-alpha  
643 was used as a positive control (150 bp), -Ctr: PCR negative control. Alignment of the sequenced  
644 PCR product for candidate C) tRNA<sup>ValCAC</sup>-VIT\_15s0046g02860 and D) tRNA<sup>ProTGG</sup>-  
645 VIT\_18s0001g09050 to the expected PCR product confirmed active transcription of the  
646 intergenic region.

647 **Figure 5.** Genomic distance between protein coding genes (PGCs) and tRNA for dicistronic and  
648 monocistronic transcripts. Vertical bars show the number of neighbouring tRNAs and PGCs  
649 pairs forming putative dicistronic tRNA-mRNA transcripts (red), or monocistronic transcripts  
650 (blue).

651 **Figure 6.** Effect of region of origin on the expression of dicistronic tRNA-mRNAs. Top panel:  
652 Schematic representation of RNA-seq reads mapping when originated from a dicistronic  
653 transcript (purple bars), a monocistronic tRNA transcript (blue bars) and a monocistronic protein  
654 coding gene (red bars). Bottom panel: Heatmap of the expression (logCPM) of all expressed  
655 tRNAs, dicistronic tRNAs, intergenic region and dicistronic protein coding genes (rows) for  
656 each sub-region from the Barossa Wine growing region (columns) for leaf and berry samples.

657 Dendrograms represent the hierarchical clustering analysis of the sub-regions according to each  
658 genomic feature expression pattern.

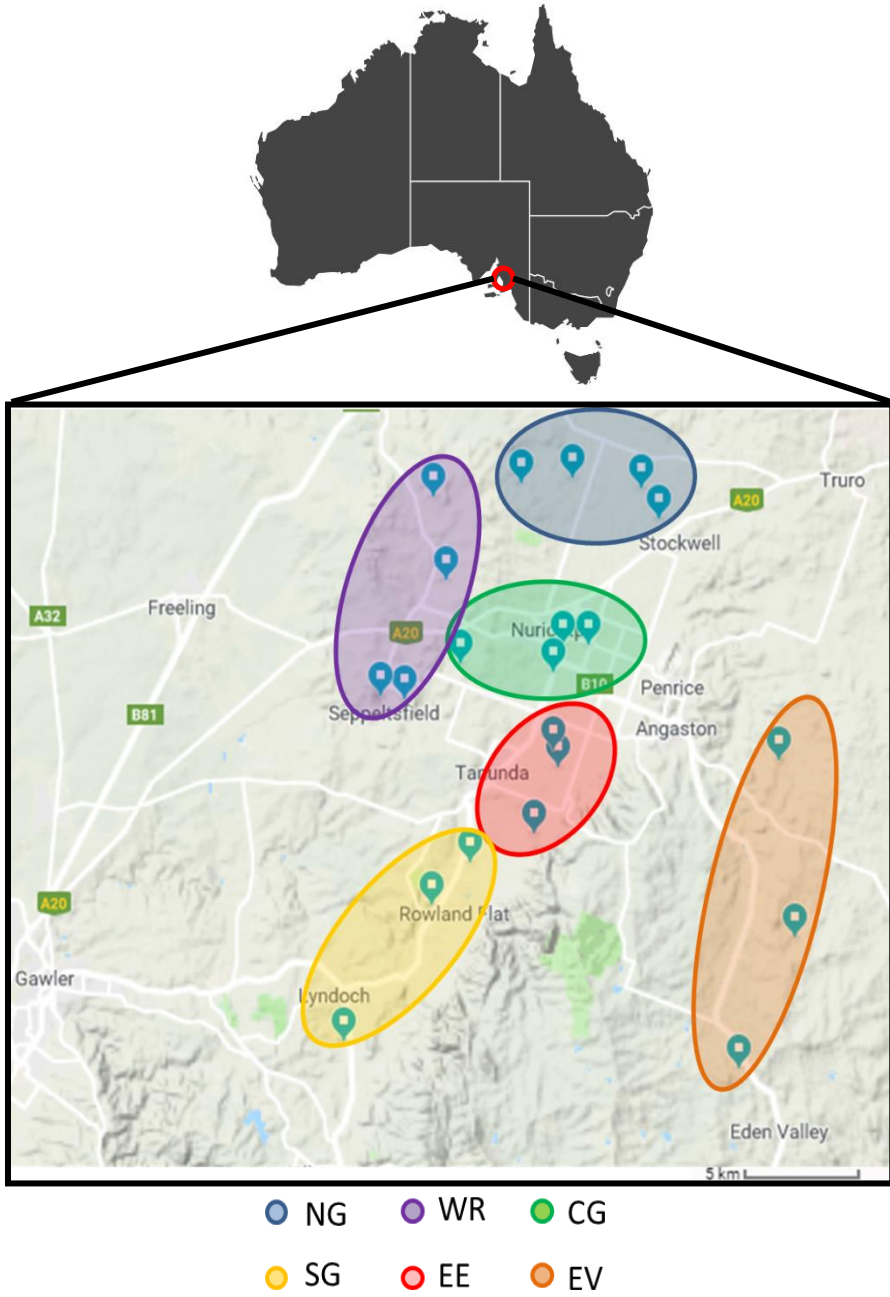

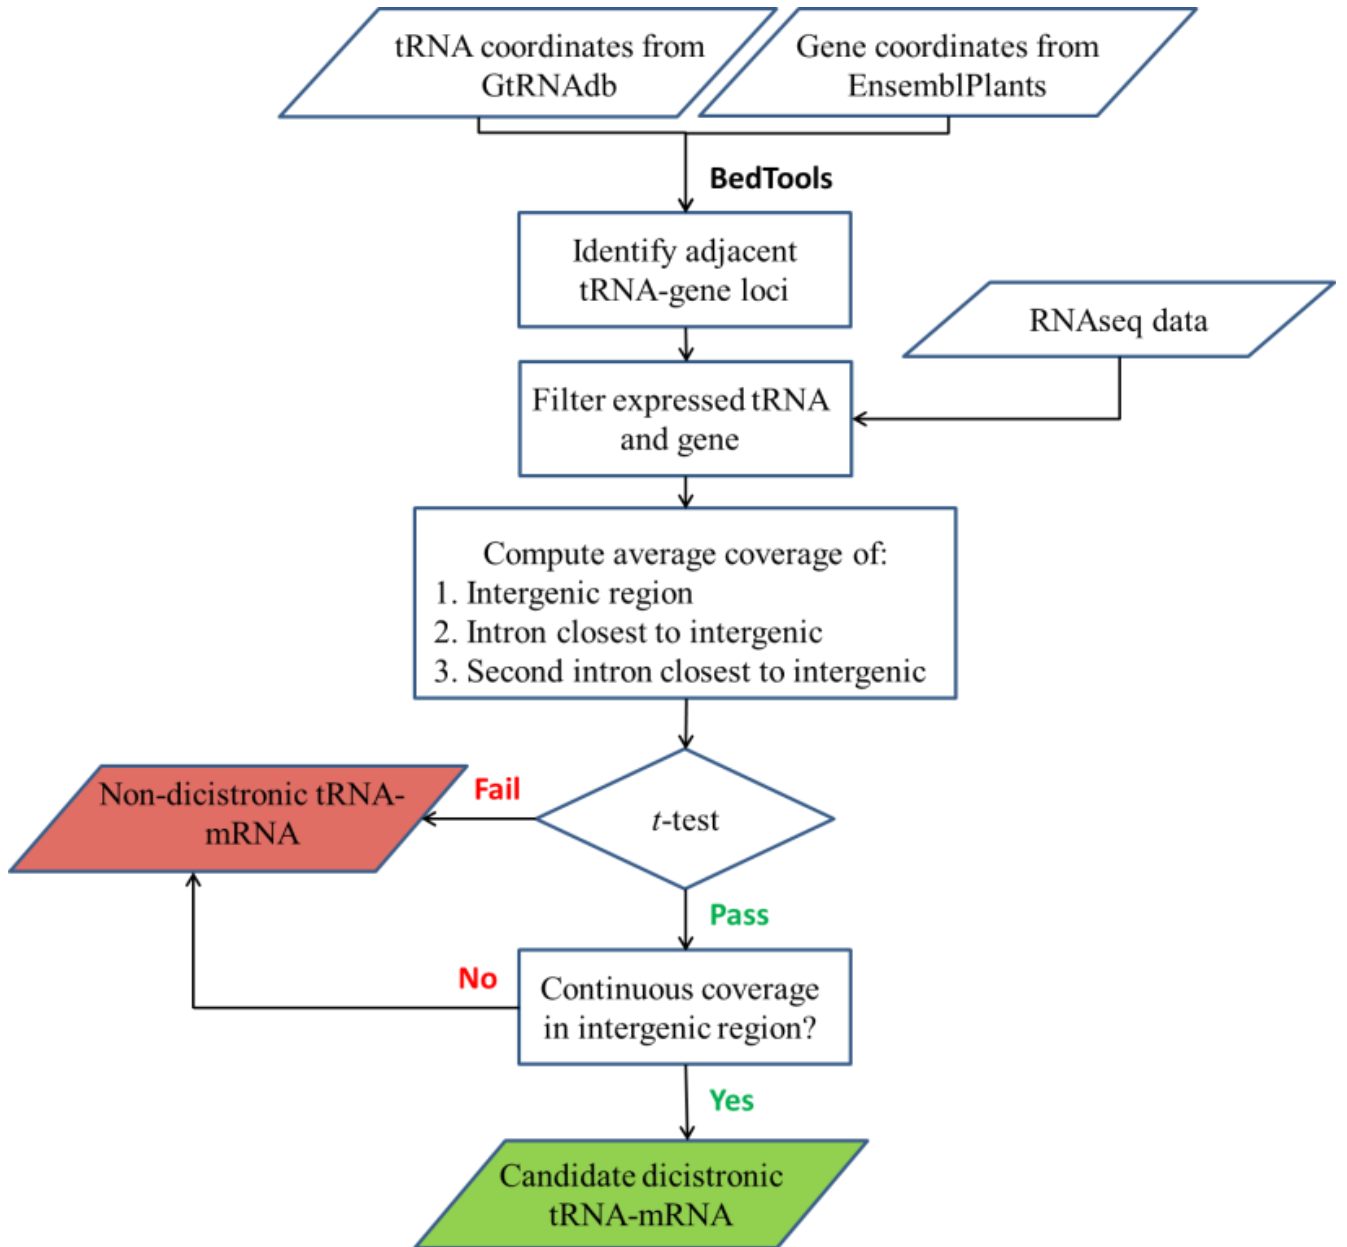



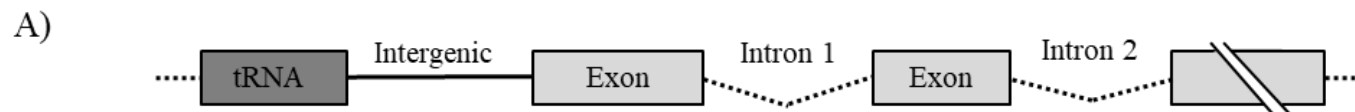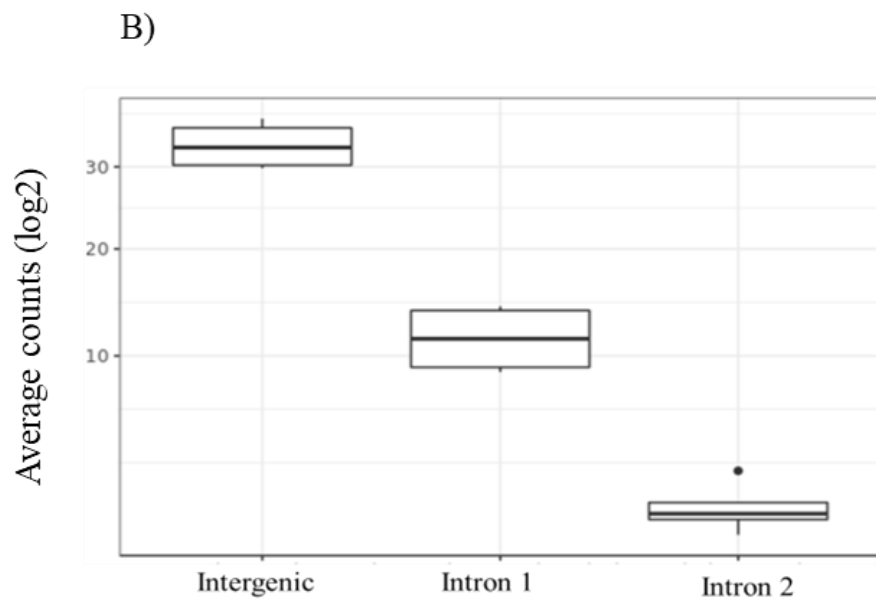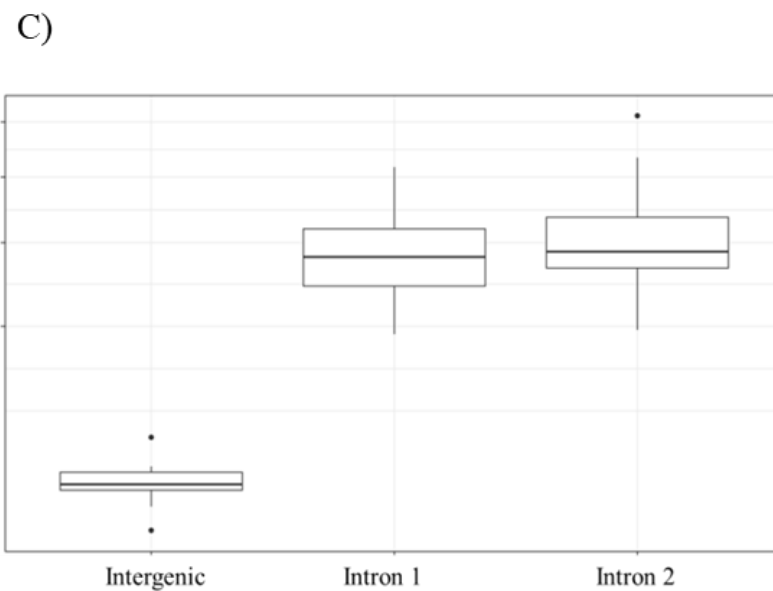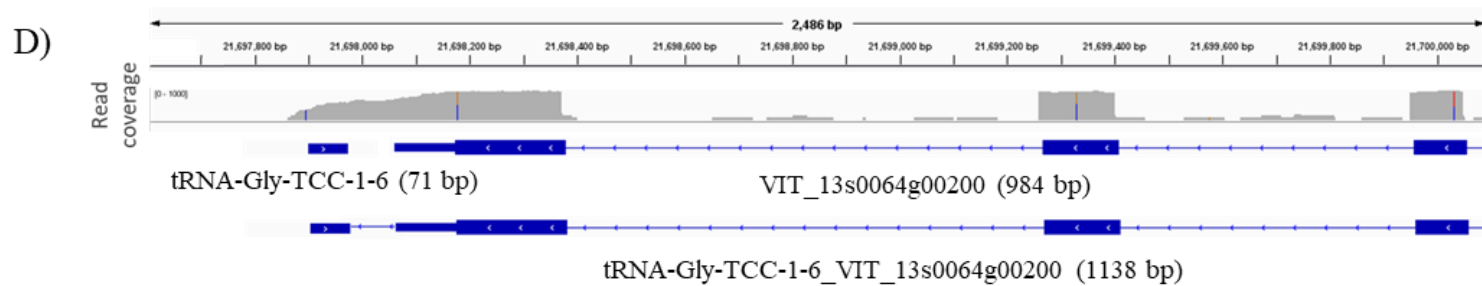

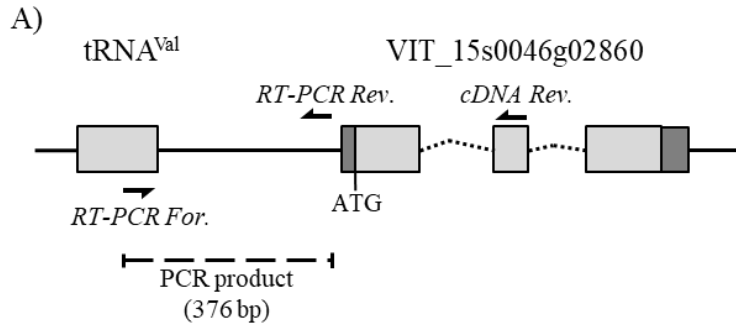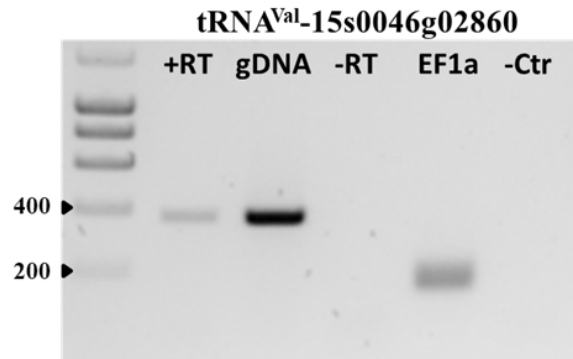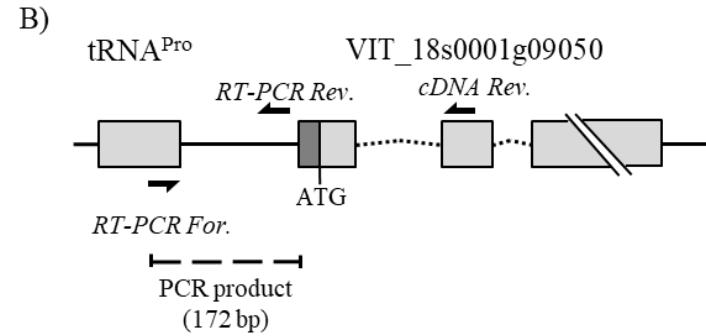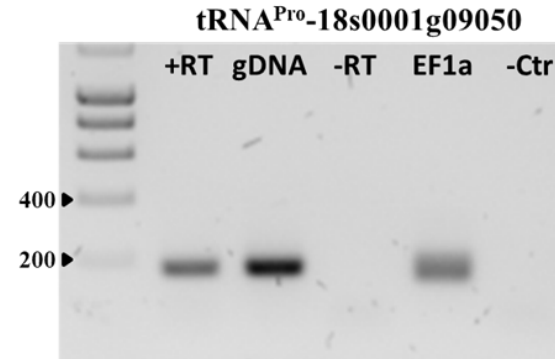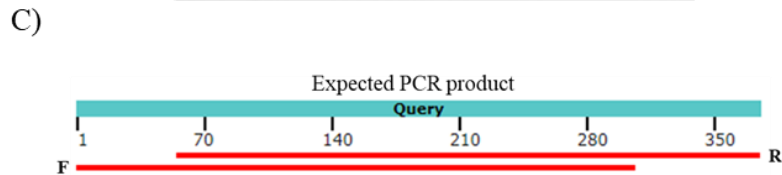

| Target ID                          | Primer      | E value   | Identity % |
|------------------------------------|-------------|-----------|------------|
| tRNA-Val-CAC-1-7_Intergenic_region | Forward (F) | 6.00E-172 | 99.69%     |
|                                    | Reverse (R) | 1.00E-164 | 99.67%     |

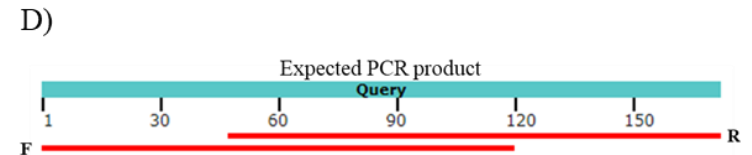

| Target ID                          | Primer      | E value  | Identity % |
|------------------------------------|-------------|----------|------------|
| tRNA-Pro-TGG-2-9_Intergenic_region | Forward (F) | 9.00E-64 | 99.19%     |
|                                    | Reverse (R) | 6.00E-60 | 99.16%     |

Complete alignments in Supplemental file 1

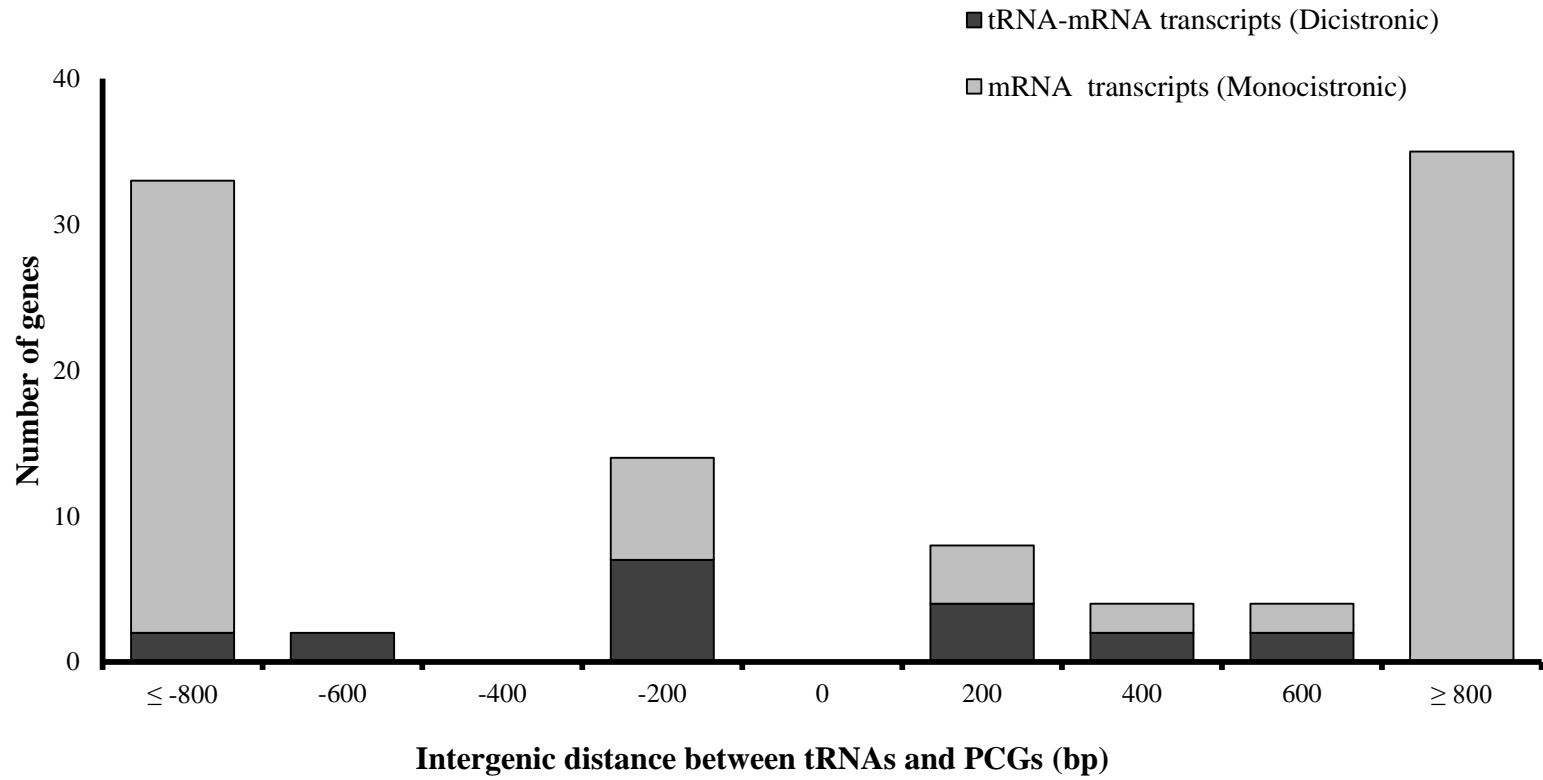

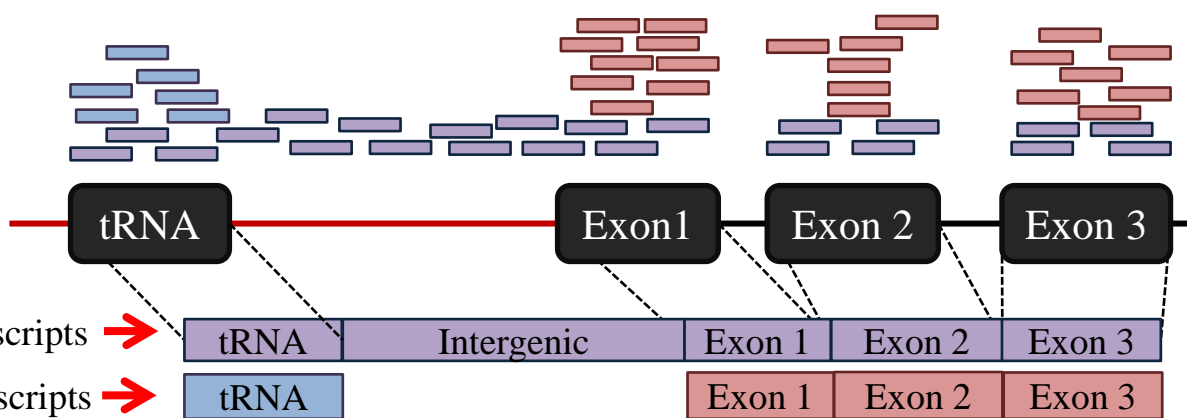

**All expressed tRNAs**

**Dicistronic tRNAs**

**Intergenic region**

**Dicistronic PCGs**

**Leaf**

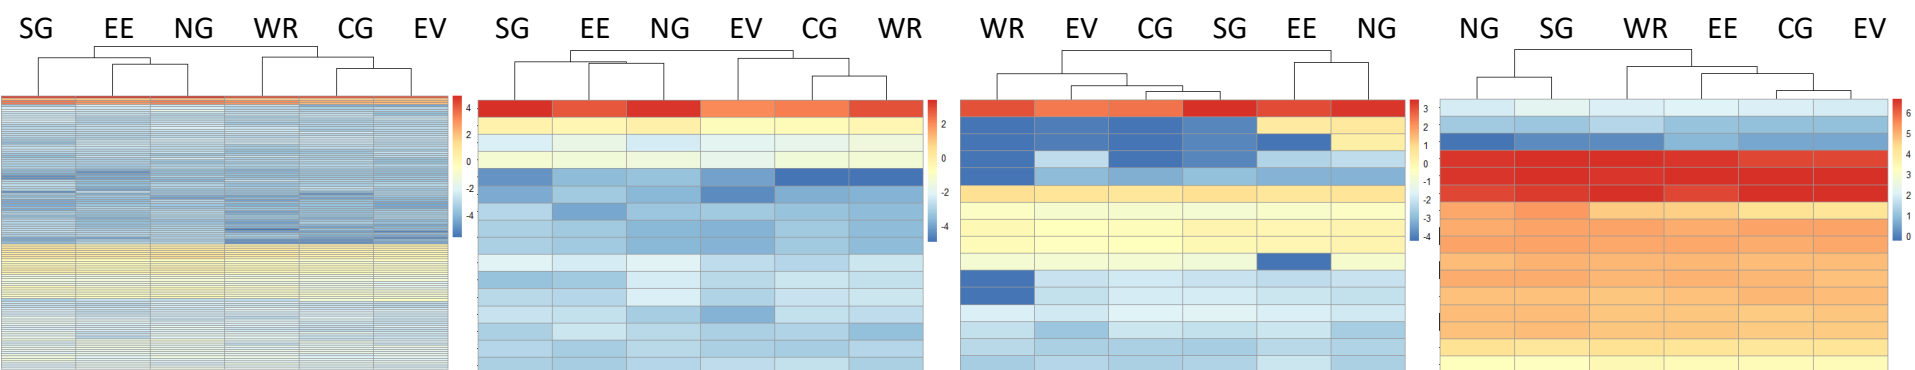

**Berry**

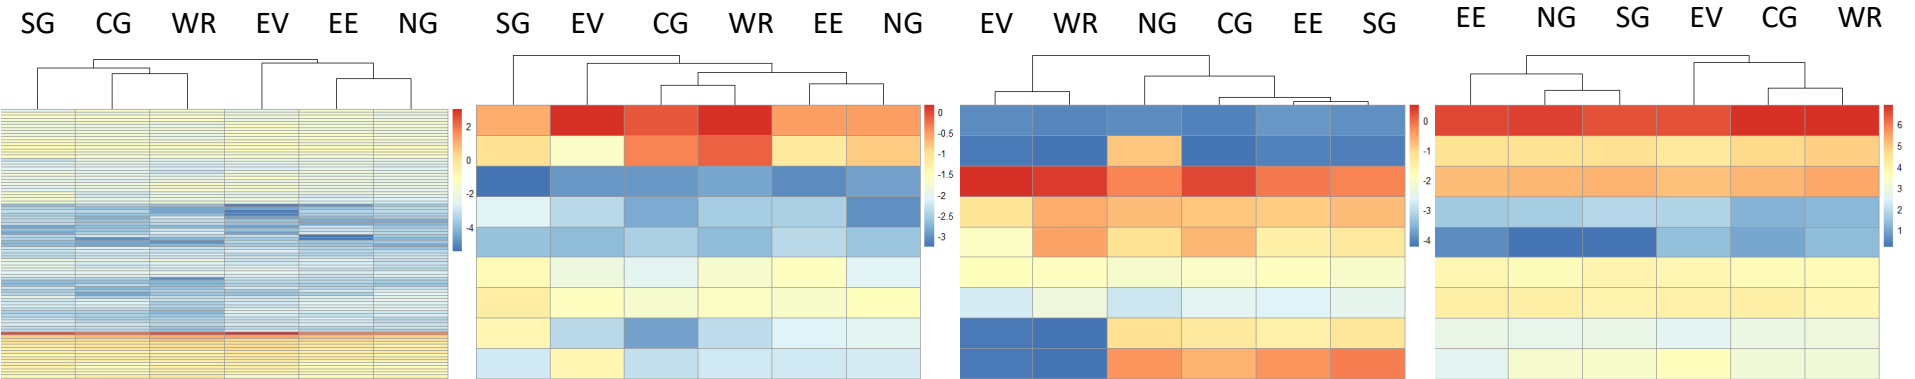

Source: https://www.biorxiv.org/content/10.1101/2020.04.13.039131v1.full.pdf
